# Supplementary material
Source: PubMed Central journal article supplement (PMC8377766)

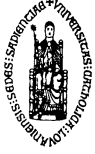

DX (11/11/10 20:27)  
ldsx10\_spl & ABP.RMD

**EXPANDED METHODS and DATA SUPPLEMENT**  
**Ambulatory Blood Pressure Monitoring in 9357 Subjects from 11 Populations Highlights**  
**Missed Opportunities for Cardiovascular Prevention in Women**

Short title: Sex-Specific Risks Associated with Blood Pressure

José Boggia, Lutgarde Thijs, Tine W. Hansen, Yan Li, Masahiro Kikuya,  
Kristina Björklund-Bodegård, Tom Richart, Takayoshi Ohkubo, Jørgen Jeppesen,  
Christian Torp-Pedersen, Eamon Dolan, Tatiana Kuznetsova,  
Katarzyna Stolarz-Skrzypek, Valérie Tikhonoff, Sofia Malyutina, Edoardo Casiglia,  
Yuri Nikitin, Lars Lind, Gladys Maestre, Edgardo Sandoya, Kalina Kawecka-Jaszcz, Yutaka Imai,  
Jiguang Wang, Hans Ibsen, Eoin O'Brien, Jan A. Staessen,  
on behalf of the International Database on Ambulatory blood pressure in relation to Cardiovascular  
Outcomes (IDACO) Investigators

Word Counts: manuscript 8821, summary 248  
Number: Tables 6; Figures 2

**Correspondence to:**

Jan A. Staessen, MD, PhD, FESC, FAHA,  
Studies Coordinating Centre,  
Laboratory of Hypertension,  
University of Leuven,  
Campus Sint Rafaël,  
Kapucijnenvoer 35,  
Block d, Level 00, Box 7001,  
B-3000 Leuven, Belgium

Telephone: +32-16-34-7104 (office)  
+32-15-41-1747 (home)  
+32-47-632-4928 (mobile)  
Facsimile: +32-16-34-7106 (office)  
+32-15-41-4542 (home)

email: [jan.staessen@med.kuleuven.be](mailto:jan.staessen@med.kuleuven.be)  
[jan.staessen@epid.unimaas.nl](mailto:jan.staessen@epid.unimaas.nl)

Centro de Nefrología and Departamento de Fisiopatología, Hospital de Clínicas, Universidad de la República, Montevideo, Uruguay (J.B.); the Studies Coordinating Centre, Division of Hypertension and Cardiovascular Rehabilitation, Department of Cardiovascular Diseases, University of Leuven, Belgium (Y.L., L.T., T.R., T.K., J.A.S.); Research Center for Prevention and Health and Department of Clinical Physiology, Nuclear Medicine and PET, Copenhagen University Hospital, Faculty of Health Sciences, Rigshospitalet, Copenhagen, Denmark (T.W.H.); Center for Epidemiological Studies and Clinical Trials (Y.L., J.W.); and Center for Vascular Evaluation (Y.L.), Ruijin Hospital, Shanghai Jiaotong University School of Medicine, Shanghai, China; the Tohoku University Graduate School of Pharmaceutical Science and Medicine, Sendai, Japan (M.K., T.O., Y.I.); the Shiga University School of Medical Science, Otsu, Japan (T.O.); the Section of Geriatrics, Department of Public Health and Caring Sciences, Uppsala University, Uppsala, Sweden (K.B.B., L.L.); the Copenhagen University Hospital, Copenhagen, Denmark (J.J., C.T.P.); Cambridge University Hospitals, Addenbrook's Hospital, Cambridge, United Kingdom (E.D.); First Department of Cardiology and Hypertension, Jagiellonian University Medical College, Kraków, Poland (K.S.S., K.K.J); Department of Clinical and Experimental Medicine, University of Padova, Padova, Italy (V.T., E.C.); Institute of Internal Medicine, Novosibirsk, Russian Federation (T.K., S.M., Y.N.); Laboratorio de Neurociencias, Universidad del Zulia, Maracaibo, Venezuela (G.M.); the Asociación Española Primera de Socorros Mutuos, Montevideo, Uruguay (E.S.); Aarhus University and Division of Cardiology, Holbak Hospital, Holbak, Denmark (H.I.); the Conway Institute of Biomolecular and Biomedical Research, University College Dublin, Dublin, Ireland (E.O.); and Department of Epidemiology, Maastricht University, Maastricht, The Netherlands (T.R., J.A.S.). The IDACO investigators are listed in the data supplement available online at <http://hyper.ahajournals.org>.

Correspondence to Dr Jan A. Staessen, Studies Coordinating Centre, Division of Hypertension and Cardiovascular Rehabilitation, Department of Cardiovascular Diseases, University of Leuven, Campus Sint Rafaël, Kapucijnenvoer 35, Block D, Box 7001, BE-3000 Leuven, Belgium.  
E-mail: [jan.staessen@med.kuleuven.be](mailto:jan.staessen@med.kuleuven.be)

## Expanded Methods

### Study Population

As described in detail elsewhere,<sup>1</sup> we constructed the International Database on Ambulatory blood pressure monitoring in relation to Cardiovascular Outcomes (IDACO). Studies were eligible for inclusion, if they involved a random population sample, if baseline information on the ambulatory blood pressure and cardiovascular risk factors was available, and if the subsequent follow-up included both fatal and nonfatal outcomes.

At the time of writing this report, the IDACO database included prospective studies from 11 centers (11,785 subjects). In line with previous reports, we excluded 252 participants (2.1%), because they were less than 18 years old at the moment of enrolment and 219 (1.9%) because their conventional blood pressure had not been measured. We also excluded 493 (4.2%) and 1464 (12.4%) participants, because their ambulatory recording included less than 30 readings over the whole day or less than 5 readings during nighttime, respectively. Thus, the number of subjects statistically analyzed totaled 9357. The participants were 2142 residents from Copenhagen, Denmark;<sup>2</sup> 1124 subjects from Noorderkempen, Belgium;<sup>3</sup> 1097 older men from Uppsala, Sweden;<sup>4</sup> 244 subjects from Novosibirsk, the Russian Federation;<sup>5,6</sup> 1312 inhabitants from Ohasama, Japan;<sup>7</sup> 349 villagers from the JingNing county, China;<sup>8</sup> 1372 subjects from Montevideo, Uruguay;<sup>9</sup> 165 subjects from Pilsen, the Czech Republic;<sup>6</sup> 934 subjects from Dublin, Ireland;<sup>10</sup> 310 subjects from Padova, Italy,<sup>6</sup> and 308 subjects from Kraków, Poland.<sup>6</sup>

### Blood Pressure Measurement

Conventional blood pressure was measured by trained observers with a mercury sphygmomanometer,<sup>2-6,8,10</sup> with validated auscultatory<sup>7</sup> (USM-700F, UEDA Electronic Works, Tokyo, Japan) or oscillometric<sup>9</sup> (OMRON HEM-705CP, Omron Corporation, Tokyo, Japan) devices, using the appropriate cuff size, with participants in the sitting<sup>2,3,5-10</sup> or supine<sup>4</sup> position. Conventional blood pressure was the average of two consecutive readings obtained either at the person's home<sup>3,5,6,8,9</sup> or at an examination center.<sup>2,4,7,10</sup> Hypertension was a conventional blood pressure of at least 140 mm Hg systolic or 90 mm Hg diastolic or the use of antihypertensive drugs.<sup>11</sup>

We programmed portable monitors to obtain ambulatory blood pressure readings at 30-minute intervals throughout the whole day,<sup>7,10</sup> or at intervals ranging from 15<sup>2</sup> to 30<sup>4</sup> minutes during daytime and from 30<sup>2</sup> to 60<sup>4</sup> minutes at night. The devices implemented an auscultatory algorithm (Accutacker II) in Uppsala<sup>4</sup> or an oscillometric technique (Spacelabs 90202 and 90207, Takeda TM-2421, and ABPM-630) in the other cohorts.<sup>2,3,5-10</sup>

The same SAS macro processed all ambulatory recordings, which generally stayed unedited. The Ohasama recordings were edited sparsely according to previously published criteria.<sup>12</sup> While accounting for the daily pattern of activities of the participants, we defined daytime as the interval from 10 AM to 8 PM in Europeans<sup>2-6,10</sup> and South Americans,<sup>9</sup> and from 8 AM to 6 PM in Asians.<sup>7,8</sup> The corresponding nighttime intervals ranged from midnight to 6 AM<sup>2-6,9,10</sup> and from 10 PM to 4 AM,<sup>7,8</sup> respectively. These fixed intervals eliminate the transition periods in the morning and evening when blood pressure changes rapidly, resulting in daytime and nighttime blood pressure levels that are within 1–2 mm Hg of the awake and asleep levels. Within individual subjects, we weighted the means of the ambulatory blood pressure by the interval between readings. In dichotomous analyses, we considered 50 years of age as a cut-off limit, because cardiovascular risk increases in postmenopausal women and because 50 years is close to the median age at menopause.<sup>13</sup>

### Other Measurements

In all cohorts, we administered a questionnaire to obtain information on each subject's medical history, and smoking and drinking habits. Body mass index was body weight in kilograms divided by height in meters squared. We measured serum cholesterol and blood glucose by automated enzymatic methods. Diabetes mellitus was the use of antidiabetic drugs, a fasting blood glucose concentration of at least 7.0 mmol/L<sup>2-7,9,10</sup> a random blood glucose concentration of at least 11.1 mmol/L,<sup>3,7,8</sup> a self-reported diagnosis,<sup>3,8,9</sup> or diabetes documented in practice or hospital records.<sup>9</sup>

**Ascertainment of Events**

We ascertained vital status and the incidence of fatal and nonfatal diseases from the appropriate sources in each country, as described in previous publications.<sup>6,9,12-14</sup> Fatal and nonfatal stroke did not include transient ischemic attacks. Coronary events encompassed death from ischemic heart disease, sudden death, nonfatal myocardial infarction, and coronary revascularization. Cardiac events comprised coronary endpoints and fatal and nonfatal heart failure. The composite cardiovascular endpoint included all aforementioned endpoints plus cardiovascular mortality. In all outcome analyses, we only considered the first event within each category. The International Classification of Disease code numbers used to differentiate these events are available in Table S1.

**Statistical Methods**

For database management and statistical analysis, we used SAS software, version 9.1.3 (SAS Institute, Cary, NC). For comparison of means and proportions, we applied the large-sample z-test and the  $\chi^2$ -statistic, respectively. Statistical significance was a *P*-value of 0.05 or less on two-sided tests.

Because in middle-aged and older subjects, systolic blood pressure is a stronger risk factor than diastolic blood pressure,<sup>16-18</sup> we limited our analyses to systolic blood pressure. We first plotted incidence rates by fifths of the distributions of systolic blood pressure, while standardizing for cohort and age by the direct method. In dichotomous analyses, we considered 50 years of age as a cut-off limit, because cardiovascular risk increases in postmenopausal women and because 50 years is close to the median age at menopause.<sup>19</sup> We used Kaplan-Meier survival function estimates, plotted according to current recommendations,<sup>20</sup> and the log-rank test to estimate and compare incidence rates by sex. We applied Cox regression to compute standardized hazard ratios, which express the risk for a 1-SD change in the independent variables. We checked the proportional hazards assumption by the Kolmogorov-type supremum test, and by testing the interaction terms between follow-up duration and the risk variable of interest. The hazard ratios were adjusted for cohort, age, body mass index, smoking and drinking, serum cholesterol, history of cardiovascular disease, diabetes mellitus, and treatment with antihypertensive drugs. In analyses stratified by cohort, we pooled the participants recruited in the framework of the European Project on Genes in Hypertension (Kraków, Novosibirsk, Padova, and Pilsen).<sup>11</sup>

## References

1. Thijs L, Hansen TW, Kikuya M, Björklund-Bodeg?rd K, Li Y, Dolan E, Tikhonoff V, Sleidlerová J, Kuznetsova T, Stolarz K, Bianchi M, Richart T, Casiglia E, Malyutina S, Filipovský J, Kawecka-Jaszcz K, Nikitin Y, Ohkubo T, Sandoya E, Wang JG, Torp-Pedersen C, Lind L, Ibsen H, Imai Y, Staessen JA, on behalf of the IDACO Investigators. The International Database of Ambulatory blood pressure in relation to Cardiovascular Outcome (IDACO): protocol and research perspectives. *Blood Press Monit.* 2007;12:255–262.
2. Hansen TW, Jeppesen J, Rasmussen S, Ibsen H, Torp-Pedersen C. Ambulatory blood pressure and risk of cardiovascular disease : a population based study. *Am J Hypertens.* 2006;19:243–259.
3. Staessen JA, Bieniaszewski L, O'Brien ET, Imai Y, Fagard R. An epidemiological approach to ambulatory blood pressure monitoring: the Belgian population study. *Blood Press Monit.* 1996;1:13–26.
4. Ingelsson E, Björklund K, Lind L, Ärnlöv J, Sundström J. Diurnal blood pressure pattern and risk of congestive heart failure. *JAMA.* 2006;295:2859–2866.
5. Kuznetsova T, Malyutina S, Pello E, Thijs L, Nikitin Y, Staessen JA. Ambulatory blood pressure of adults in Novosibirsk, Russia: interim report on a population study. *Blood Press Monit.* 2000;5:291–296.
6. Kuznetsova T, Staessen JA, Kawecka-Jaszcz K, Babeanu S, Casiglia E, Filipovský J, Nachev C, Nikitin Y, Peleská J, O'Brien E, on behalf of the EPOGH Investigators. Quality control of the blood pressure phenotype in the European Project on Genes in Hypertension. *Blood Press Monit.* 2002;7:215–224.
7. Ohkubo T, Hozawa A, Yamaguchi J, Kikuya M, Ohmori K, Michimata M, Matsubara M, Hashimoto J, Hoshi H, Araki T, Tsuji I, Satoh H, Hisamichi S, Imai Y. Prognostic significance of the nocturnal decline in blood pressure in individuals with and without high 24-h blood pressure: the Ohasama study. *J Hypertens.* 2002;20:2183–2189.
8. Li Y, Wang JG, Gao HF, Nawrot T, Wang GL, Qian YS, Staessen JA, Zhu DL. Are published characteristics of the ambulatory blood pressure generalizable to rural Chinese? The JingNing population study. *Blood Press Monit.* 2005;10:125–134.
9. Schettini C, Bianchi M, Nieto F, Sandoya E, Senra H, Hypertension Working Group. Ambulatory blood pressure. Normality and comparison with other measurements. *Hypertension.* 1999;34 (part 2):818–825.
10. O'Brien E, Murphy J, Tyndall A, Atkins N, Mee F, McCarthy G, Staessen J, Cox J, O'Malley K. Twenty-four-hour ambulatory blood pressure in men and women aged 17 to 80 years: the Allied Irish Bank Study. *J Hypertens.* 1991;9:355–360.
11. Mancia G, De Backer G, Dominiczak A, Cifkova R, Fagard R, Germano G, Grassi G, Heagerty AM, Kjeldsen SE, Laurent S, Narkiewicz K, Ruilope L, Rynkiewicz A, Schmieder RE, Struijker-Boudier HA, Zanchetti A. 2007 Guidelines for the management of arterial hypertension. The Task Force for the management of arterial hypertension of the European Society of Hypertension (ESH) and of the European Society of Cardiology (ESC) *J Hypertens.* 2007;25:1105–1187.

12. Ohkubo T, Imai Y, Tsuji I, Nagai K, Ito S, Satoh H, Hisamichi S. Reference values for 24-hour ambulatory blood pressure monitoring based on a prognostic criterion. The Ohasama Study. *Hypertension*. 1998;32:255–259.
13. Staessen JA, Bieniaszewski L, Brosens I, Fagard R. The epidemiology of menopause and its association with cardiovascular disease. In Messerli FH, Aepfelbacher FC (eds): *Hypertension in Postmenopausal Women*. New York, Marcel Dekkers Inc, 1996, pp 43–78.

**Legend to Figures**

**Figure S1.** Absolute 10-year risk of death (A), a composite cardiovascular (CV) endpoint (B), a fatal or nonfatal stroke (C), or a fatal or nonfatal cardiac event (D) in relation to the nighttime systolic blood pressure.

The continuous risk functions cover the 5th to 95th percentile interval of the nighttime systolic blood pressure and were fitted by Cox regression with adjustment for cohort, age, body mass index, smoking and drinking, serum total cholesterol, history of cardiovascular disease, presence of diabetes mellitus, and antihypertensive drug treatment at baseline. Circles (women) and squares (men) represent the multivariable-adjusted hazard rates by fifths of the distribution of the nighttime systolic blood pressure and have a size proportional to the inverse of the variance of the hazard ratio. The number of events in each quintile is given next to each circle or square; ne is the total number of events by disease category and sex. The P-values for interaction were derived from multivariable-adjusted Cox models as given in Tables 2 and 3.

**Figure S2.** Night-to-day ratio of systolic blood pressure and nocturnal fall in systolic blood pressure by sex and age group. For each sex and age group, the number of subjects contributing to the mean is given. BP indicates blood pressure.

**Table S1. International Classification of Diseases (ICD) Codes Applied in each Cohort**

| <b>Cohort</b> | <b>Stroke</b>                                        | <b>Myocardial infarction</b>             | <b>Angina pectoris</b>                               | <b>Heart failure</b>                                                                 |
|---------------|------------------------------------------------------|------------------------------------------|------------------------------------------------------|--------------------------------------------------------------------------------------|
| Copenhagen    | <i>ICD8</i> 430-434 and 436,<br><i>ICD10</i> I60-I64 | <i>ICD8</i> 410,<br><i>ICD10</i> I21-I22 | <i>ICD8</i> 411-414,<br><i>ICD10</i> I20 and I23-I25 | <i>ICD8</i> 427.0, 427.1, 428.0, 429.0, 519.1 and 782.4,<br><i>ICD10</i> I50 and J81 |
| Noorderkempen | <i>ICD8</i> 430-434, 436 and 438                     | <i>ICD8</i> 410                          | <i>ICD8</i> 413                                      | <i>ICD8</i> 427.0, 427.1, 428.0, 429.0, 519.1 and 782.4                              |
| Uppsala       | <i>ICD9</i> 430-434 and 436,<br><i>ICD10</i> I60-I64 | <i>ICD9</i> 410,<br><i>ICD10</i> I21     | <i>ICD9</i> 413 and 411.1, <i>ICD10</i> I20          | <i>ICD9</i> 429, <i>ICD10</i> I50                                                    |
| Dublin        | <i>ICD9</i> 430-434 and 436                          | <i>ICD9</i> 410 and 412                  | <i>ICD9</i> 413, 411.1 and 414                       | <i>ICD9</i> 428                                                                      |
| Novosibirsk   | <i>ICD9</i> 430-434 and 436                          | <i>ICD9</i> 410 and 412                  | <i>ICD9</i> 413 and 411.1                            | <i>ICD9</i> 428                                                                      |
| Pilsen        | <i>ICD9</i> 430-434 and 436                          | <i>ICD9</i> 410 and 412                  | <i>ICD9</i> 413 and 411.1                            | <i>ICD9</i> 428                                                                      |
| Padova        | <i>ICD9</i> 430-434 and 436                          | <i>ICD9</i> 410 and 412                  | <i>ICD9</i> 413 and 411.1                            | <i>ICD9</i> 428                                                                      |
| Kraków        | <i>ICD9</i> 430-438                                  | <i>ICD9</i> 410                          | <i>ICD9</i> 413                                      | <i>ICD9</i> 428.0-428.4                                                              |
| Montevideo    | <i>ICD10</i> I60-I64                                 | <i>ICD10</i> I21-I22                     | <i>ICD10</i> I20                                     | <i>ICD10</i> I50 and J81                                                             |
| Ohasama       | <i>ICD10</i> I60-I64                                 | .....                                    | .....                                                | .....                                                                                |
| JingNing      | <i>ICD9</i> 430-431 and 434                          | <i>ICD9</i> 410                          | <i>ICD9</i> 413                                      | <i>ICD9</i> 428, 427.0 and 427.1                                                     |

..... Not assessed, because of the low incidence in the Ohasama cohort.



**Table S2: Baseline Characteristics by Sex and Age Group**

| Characteristics                    | Women              |                    |                  | Men                |                    |                  |
|------------------------------------|--------------------|--------------------|------------------|--------------------|--------------------|------------------|
|                                    | <50 yr<br>(n=1953) | ≥50 yr<br>(n=2444) | All<br>(n= 4397) | <50 yr<br>(n=1722) | ≥50 yr<br>(n=3238) | All<br>(n= 4960) |
| Number with characteristic (%)     |                    |                    |                  |                    |                    |                  |
| Hypertension                       | 257 (13.2)         | 1270 (52.0)        | 1527 (34.7)      | 367 (21.3)         | 1972 (60.9)        | 2339 (47.2)      |
| Antihypertensive treatment         | 103 (5.27)         | 745 (30.5)         | 848 (19.3)       | 67 (3.9)           | 888 (27.4)         | 955 (19.3)       |
| Diabetes mellitus                  | 51 (2.6)           | 192 (7.9)          | 243 (5.5)        | 44 (2.6)           | 327 (10.1)         | 371 (7.5)        |
| Current smokers                    | 526 (26.6)         | 419 (17.1)         | 945 (21.5)       | 675 (39.2)         | 1056 (32.6)        | 1731 (34.9)      |
| Current drinkers                   | 738 (37.8)         | 840 (34.4)         | 1578 (35.9)      | 990 (57.5)         | 2050 (63.3)        | 3040 (61.3)      |
| History of CV disease              | 47 (2.4)           | 185 (7.6)          | 232 (5.3)        | 53 (3.1)           | 443 (13.7)         | 496 (10.0)       |
| Mean values±SD                     |                    |                    |                  |                    |                    |                  |
| Age, y                             | 36.1±8.5           | 61.7±6.2           | 50.3±15.2        | 36.3±8.4           | 65.0±7.9           | 55.0±15.9        |
| Body mass index, kg/m <sup>2</sup> | 23.9±4.3           | 25.6±4.5           | 24.8±4.5         | 25.34±3.9          | 26.1±3.8           | 25.8±3.9         |
| Blood pressure, mm Hg              |                    |                    |                  |                    |                    |                  |
| Conventional systolic              | 115.6±14.7         | 133.6±20.2         | 125.6±20.1       | 124.3±14.7         | 140.0±20.0         | 134.5±19.8       |
| 24-hour systolic                   | 113.7±10.1         | 124.8±13.6         | 119.9±13.4       | 121.4±10.3         | 130.0±14.5         | 127.0±13.8       |
| Daytime systolic                   | 119.9±11.1         | 130.9±14.6         | 126.0±14.3       | 128.0±11.5         | 136.7±15.5         | 133.7±14.8       |
| Nighttime systolic                 | 103.3±10.3         | 113.1±15.1         | 108.7±14.1       | 110.2±10.9         | 117.9±16.3         | 115.2±15.1       |
| Conventional diastolic             | 74.3±10.2          | 79.4±11.8          | 77.1±11.4        | 78.6±10.9          | 83.3±11.2          | 81.7±11.3        |
| 24-hour diastolic                  | 70.1±7.5           | 72.9±8.3           | 71.6±8.1         | 73.8±7.9           | 76.5±8.3           | 75.6±8.3         |
| Daytime diastolic                  | 75.7±8.1           | 87.7±9.2           | 76.8±8.8         | 79.7±8.8           | 81.2±9.1           | 80.7±9.0         |
| Nighttime diastolic                | 60.2±8.0           | 63.9±8.8           | 62.3±8.6         | 63.7±8.5           | 67.9±9.3           | 66.4±9.2         |
| Night-to-day ratio                 | 0.86±0.06          | 0.87±0.09          | 0.86±0.08        | 0.86±0.07          | 0.86±0.09          | 0.86±0.08        |
| Non-dippers                        | 505 (25.9)         | 765 (31.3)         | 1270 (28.9)      | 442 (25.7)         | 961 (29.7)         | 1403 (28.3)      |
| Serum cholesterol, mmol/L          | 5.17±1.03          | 5.94±1.18          | 5.63±1.18        | 5.42±1.21          | 5.74±1.12          | 5.64±1.16        |

CV indicates cardiovascular. Hypertension was a conventional blood pressure of at least 140 mm Hg systolic or 90 mm Hg diastolic or use of antihypertensive drugs. Diabetes mellitus was use of antidiabetic drugs, a fasting blood glucose concentration of  $\geq 7.0$  mmol/L, a random blood glucose concentration of  $\geq 11.1$  mmol/L, a self-reported diagnosis, or diabetes documented in practice or hospital records. We considered 50 years of age as a cut-off limit, because it is the median age at menopause.<sup>19</sup> All baseline characteristics differed by age group in both sexes. The only exception was the proportion of nondippers, defined as night-to-day systolic pressure ratio of  $\geq 0.90$ . Nondipping was significantly more frequent ( $P < 0.01$ ) among older women (31.3% vs 25.9%) and men (29.7% vs 25.7%) than in younger subjects. In continuous analyses of the night-to-day ratio, however, the age differences disappeared in women (0.87 vs 0.86;  $P = 0.25$ ) as well as in men (0.86 vs 0.86;  $P = 0.47$ ).

**Table S3. Multivariable-Adjusted Standardized Hazard Ratios for All-Cause Mortality in Relation to the 24-h and Nighttime Systolic Blood Pressures by Sex with One Cohort Excluded at a Time**

| Excluded cohort        | Deaths (n) | At risk (n) | 24-h              | Nighttime         |
|------------------------|------------|-------------|-------------------|-------------------|
| None                   |            |             |                   |                   |
| Women                  | 391        | 4397        | 1.25 (1.12–1.38)‡ | 1.30 (1.18–1.44)‡ |
| Men                    | 854        | 4960        | 1.12 (1.04–1.19)† | 1.14 (1.07–1.20)‡ |
| <i>P</i>               | 1245       | 9357        | 0.097             | 0.023             |
| Copenhagen (n=2142)    |            |             |                   |                   |
| Women                  | 258        | 3371        | 1.16 (1.02–1.33)* | 1.27 (1.11–1.45)‡ |
| Men                    | 616        | 3844        | 1.11 (1.03–1.20)† | 1.13 (1.06–1.21)‡ |
| <i>P</i>               | 874        | 7215        | 0.25              | 0.039             |
| Noorderkempen (n=1124) |            |             |                   |                   |
| Women                  | 340        | 3828        | 1.24 (1.11–1.38)‡ | 1.30 (1.17–1.44)‡ |
| Men                    | 768        | 4405        | 1.11 (1.04–1.19)† | 1.12 (1.05–1.19)‡ |
| <i>P</i>               | 1108       | 8233        | 0.15              | 0.033             |
| EPOGH (n=1027)         |            |             |                   |                   |
| Women                  | 380        | 3830        | 1.26 (1.13–1.40)‡ | 1.31 (1.18–1.44)‡ |
| Men                    | 842        | 4500        | 1.11 (1.04–1.19)† | 1.14 (1.07–1.20)‡ |
| <i>P</i>               | 1222       | 8330        | 0.068             | 0.019             |
| Uppsala (n=1097)       |            |             |                   |                   |
| Women                  | 391        | 4397        | 1.25 (1.12–1.38)‡ | 1.30 (1.18–1.44)‡ |
| Men                    | 556        | 3863        | 1.14 (1.04–1.24)† | 1.18 (1.08–1.28)‡ |
| <i>P</i>               | 947        | 8260        | 0.16              | 0.096             |
| Dublin (n=934)         |            |             |                   |                   |
| Women                  | 372        | 3935        | 1.25 (1.12–1.39)‡ | 1.31 (1.18–1.45)‡ |
| Men                    | 837        | 4488        | 1.12 (1.05–1.19)† | 1.14 (1.07–1.21)‡ |
| <i>P</i>               | 1209       | 8423        | 0.076             | 0.013             |
| Montevideo (n=1372)    |            |             |                   |                   |
| Women                  | 344        | 3678        | 1.26 (1.12–1.41)‡ | 1.31 (1.18–1.46)‡ |
| Men                    | 811        | 4307        | 1.12 (1.05–1.20)‡ | 1.14 (1.08–1.21)‡ |
| <i>P</i>               | 1155       | 7985        | 0.17              | 0.054             |
| Ohasama (n=1312)       |            |             |                   |                   |
| Women                  | 265        | 3534        | 1.31 (1.16–1.49)‡ | 1.32 (1.18–1.49)‡ |
| Men                    | 704        | 4511        | 1.12 (1.04–1.20)† | 1.14 (1.07–1.21)‡ |
| <i>P</i>               | 969        | 8045        | 0.074             | 0.052             |
| JingNing (349)         |            |             |                   |                   |
| Women                  | 387        | 4206        | 1.23 (1.10–1.37)‡ | 1.28 (1.16–1.42)‡ |
| Men                    | 844        | 4802        | 1.11 (1.04–1.19)† | 1.13 (1.07–1.20)‡ |
| <i>P</i>               | 1231       | 9005        | 0.13              | 0.031             |

*P* indicates the significance of the sex difference in the hazard ratios. The hazard ratios (95% confidence interval) express the risk associated with a 1-SD increase in systolic blood pressure. EPOGH includes the cohorts recruited in Kraków (n=308), Novosibirsk (n=244), Padova (n=310) and Pilsen (n=165). All models were adjusted for cohort, age, body mass index, smoking and drinking status, serum total cholesterol, history of cardiovascular disease, presence of diabetes mellitus, and antihypertensive drug treatment at baseline. Significance of the hazard ratios: \*  $P < 0.05$ , †  $P < 0.01$ , and ‡  $P < 0.001$ .

**Table S4. Multivariable-Adjusted Standardized Hazard Ratios for the Composite Cardiovascular Endpoint in Relation to the 24-h and Nighttime Systolic Blood Pressures by Sex with One Cohort Excluded at a Time**

| Excluded cohort        | Events (n) | At risk (n) | 24-h              | Nighttime         |
|------------------------|------------|-------------|-------------------|-------------------|
| None                   |            |             |                   |                   |
| Women                  | 320        | 4397        | 1.56 (1.39–1.74)‡ | 1.54 (1.38–1.71)‡ |
| Men                    | 760        | 4960        | 1.32 (1.23–1.40)‡ | 1.24 (1.17–1.31)‡ |
| <i>P</i>               | 1080       | 9357        | 0.020             | 0.0013            |
| Copenhagen (n=2142)    |            |             |                   |                   |
| Women                  | 229        | 3371        | 1.52 (1.33–1.74)‡ | 1.49 (1.31–1.70)‡ |
| Men                    | 566        | 3844        | 1.31 (1.22–1.41)‡ | 1.22 (1.15–1.30)‡ |
| <i>P</i>               | 795        | 7215        | 0.034             | 0.0066            |
| Noorderkempen (n=1124) |            |             |                   |                   |
| Women                  | 278        | 3828        | 1.54 (1.37–1.73)‡ | 1.53 (1.37–1.71)‡ |
| Men                    | 703        | 4405        | 1.31 (1.22–1.40)‡ | 1.24 (1.17–1.31)‡ |
| <i>P</i>               | 981        | 8233        | 0.022             | 0.0010            |
| EPOGH (n=1027)         |            |             |                   |                   |
| Women                  | 310        | 3830        | 1.54 (1.37–1.72)‡ | 1.52 (1.36–1.69)‡ |
| Men                    | 738        | 4500        | 1.32 (1.24–1.41)‡ | 1.25 (1.18–1.32)‡ |
| <i>P</i>               | 1048       | 8330        | 0.037             | 0.0035            |
| Uppsala (n=1097)       |            |             |                   |                   |
| Women                  | 320        | 4397        | 1.56 (1.39–1.74)‡ | 1.54 (1.38–1.71)‡ |
| Men                    | 446        | 3863        | 1.40 (1.28–1.54)‡ | 1.37 (1.25–1.50)‡ |
| <i>P</i>               | 766        | 8260        | 0.22              | 0.12              |
| Dublin (n=934)         |            |             |                   |                   |
| Women                  | 310        | 3935        | 1.56 (1.39–1.75)‡ | 1.55 (1.39–1.72)‡ |
| Men                    | 751        | 4488        | 1.31 (1.23–1.41)‡ | 1.24 (1.17–1.31)‡ |
| <i>P</i>               | 1061       | 8423        | 0.019             | 0.0009            |
| Montevideo (n=1372)    |            |             |                   |                   |
| Women                  | 270        | 3678        | 1.57 (1.39–1.78)‡ | 1.57 (1.40–1.77)‡ |
| Men                    | 695        | 4307        | 1.31 (1.23–1.41)‡ | 1.24 (1.17–1.32)‡ |
| <i>P</i>               | 965        | 7985        | 0.067             | 0.0049            |
| Ohasama (n=1312)       |            |             |                   |                   |
| Women                  | 206        | 3534        | 1.63 (1.43–1.87)‡ | 1.31 (1.14–1.52)‡ |
| Men                    | 666        | 4511        | 1.29 (1.21–1.38)‡ | 1.22 (1.15–1.30)‡ |
| <i>P</i>               | 872        | 8045        | 0.005             | 0.0005            |
| JingNing (349)         |            |             |                   |                   |
| Women                  | 317        | 4206        | 1.54 (1.38–1.72)‡ | 1.52 (1.36–1.69)‡ |
| Men                    | 755        | 4802        | 1.31 (1.23–1.40)‡ | 1.24 (1.17–1.31)‡ |
| <i>P</i>               | 1072       | 9008        | 0.025             | 0.0019            |

Significance of the hazard ratios: \*  $P < 0.05$ , †  $P < 0.01$ , and ‡  $P < 0.001$ . For further explanation, see Table S3.

**Table S5. Multivariable-Adjusted Standardized Hazard Ratios for All-Cause Mortality in Relation to the 24-h Systolic and Nighttime Systolic Blood Pressures by Sex and Baseline Characteristics**

| Strata                 | Deaths (n) | At risk (n) | 24-h                   | Nighttime              |
|------------------------|------------|-------------|------------------------|------------------------|
| Normotension           |            |             |                        |                        |
| Women                  | 147        | 2870        | 1.29 (1.04–1.59)*      | 1.30 (1.07–1.60)†      |
| Men                    | 266        | 2621        | 1.02 (0.84–1.23) 0.86  | 1.12 (0.96–1.31) 0.150 |
| P                      | 413        | 5491        | 0.21                   | 0.34                   |
| Hypertension (HT)      |            |             |                        |                        |
| Women                  | 244        | 1527        | 1.26 (1.10–1.44)‡      | 1.33 (1.18–1.51)‡      |
| Men                    | 588        | 2339        | 1.10 (1.02–1.19)*      | 1.12 (1.05–1.20)†      |
| P                      | 832        | 3866        | 0.073                  | 0.011                  |
| Untreated HT           |            |             |                        |                        |
| Women                  | 78         | 679         | 1.43 (1.13–1.82)†      | 1.37 (1.10–1.72)†      |
| Men                    | 277        | 1384        | 1.09 (0.99–1.22) 0.16  | 1.11 (1.01–1.23)*      |
| P                      | 355        | 2063        | 0.016                  | 0.09                   |
| Controlled HT          |            |             |                        |                        |
| Women                  | 70         | 386         | 1.20 (0.90–1.59) 0.22  | 1.35 (1.04–1.76)†      |
| Men                    | 88         | 293         | 1.22 (0.93–1.60) 0.44  | 1.18 (0.91–1.52) 0.22  |
| P                      | 158        | 679         | 0.87                   | 0.48                   |
| Uncontrolled HT        |            |             |                        |                        |
| Women                  | 96         | 462         | 1.24 (0.97–1.57)0.08   | 1.40 (1.15–1.71)‡      |
| Men                    | 223        | 662         | 1.10 (0.96–1.25)0.18   | 1.11 (0.99–1.24)‡      |
| P                      | 319        | 1124        | 0.21                   | 0.024                  |
| <50 years              |            |             |                        |                        |
| Women                  | 22         | 1953        | 1.08 (0.60–1.95)       | 1.15 (0.64–2.05)       |
| Men                    | 38         | 1722        | 1.08 (0.68–1.69)       | 1.32 (0.89–1.96)       |
| P                      | 60         | 3675        | 0.64                   | 0.50                   |
| ≥50 years              |            |             |                        |                        |
| Women                  | 369        | 2444        | 1.25 (1.12–1.39)‡      | 1.31 (1.18–1.44)‡      |
| Men                    | 816        | 3238        | 1.11 (1.04–1.19)†      | 1.12 (1.06–1.20)‡      |
| P                      | 1185       | 5682        | 0.09                   | 0.020                  |
| No previous CV disease |            |             |                        |                        |
| Women                  | 345        | 4165        | 1.30 (1.16–1.45)‡      | 1.34 (1.21–1.50)‡      |
| Men                    | 674        | 4464        | 1.12 (1.04–1.21)†      | 1.14 (1.07–1.22) ‡     |
| P                      | 1019       | 8629        | 0.047                  | 0.012                  |
| Previous CV disease    |            |             |                        |                        |
| Women                  | 46         | 232         | 1.04 (0.75–1.44) 0.806 | 1.10 (0.82–1.49) 0.514 |
| Men                    | 180        | 496         | 1.10 (0.95–1.27) 0.223 | 1.11 (0.98–1.27) 0.115 |
| P                      | 226        | 728         | 0.66                   | 0.92                   |
| European               |            |             |                        |                        |
| Women                  | 214        | 2624        | 1.32 (1.15–1.52)‡      | 1.31 (1.15–1.50)‡      |
| Men                    | 651        | 3700        | 1.12 (1.04–1.21)†      | 1.13 (1.06–1.21)‡      |
| P                      | 865        | 6324        | 0.15                   | 0.14                   |
| South American         |            |             |                        |                        |
| Women                  | 47         | 719         | 1.13 (0.85–1.50) 0.39  | 1.16 (0.87–1.56) 0.297 |
| Men                    | 43         | 653         | 1.02 (0.76–1.37) 0.90  | 1.06 (0.80–1.40) 0.89  |
| P                      | 90         | 1372        | 0.37                   | 0.38                   |
| Asian                  |            |             |                        |                        |
| Women                  | 130        | 1054        | 1.17 (0.97–1.43) 0.103 | 1.35 (1.13–1.63)†      |
| Men                    | 160        | 607         | 1.14 (0.96–1.35) 0.13  | 1.18 (1.01–1.38)*      |
| P                      | 290        | 1661        | 0.55                   | 0.19                   |

Significance of the hazard ratios: \*  $P < 0.05$ , †  $P < 0.01$ , and ‡  $P < 0.001$ . For further explanation, see Table S3.

**Table S6. Multivariable-Adjusted Standardized Hazard Ratios for the Composite Cardiovascular Endpoint in Relation to the 24-h and Nighttime Systolic Blood Pressures by Sex and Baseline Characteristics**

| Strata                 | Events (n) | At risk (n) | 24-h              | Nighttime            |
|------------------------|------------|-------------|-------------------|----------------------|
| Normotension           |            |             |                   |                      |
| Women                  | 93         | 2870        | 1.53 (1.19–1.97)‡ | 1.49 (1.17–1.91)†    |
| Men                    | 184        | 2621        | 1.44 (1.16–1.80)† | 1.28 (1.07–1.53)†    |
| <i>P</i>               | 277        | 5491        | 0.89              | 0.53                 |
| Hypertension (HT)      |            |             |                   |                      |
| Women                  | 227        | 1527        | 1.52 (1.33–1.74)‡ | 1.52 (1.35–1.73)‡    |
| Men                    | 576        | 2339        | 1.26 (1.17–1.35)‡ | 1.20 (1.13–1.28)‡    |
| <i>P</i>               | 803        | 3866        | 0.022             | 0.0021               |
| Untreated HT           |            |             |                   |                      |
| Women                  | 70         | 679         | 1.85 (1.44–2.37)‡ | 1.70 (1.34–2.15)‡    |
| Men                    | 262        | 1384        | 1.31 (1.18–1.46)‡ | 1.23 (1.12–1.35)‡    |
| <i>P</i>               | 332        | 2063        | 0.0049            | 0.018                |
| Controlled HT          |            |             |                   |                      |
| Women                  | 59         | 386         | 1.34 (1.00–1.80)* | 1.45 (1.10–1.92)†    |
| Men                    | 90         | 293         | 1.52 (1.16–1.98)† | 1.21 (0.95–1.56)0.12 |
| <i>P</i>               | 149        | 679         | 0.73              | 0.20                 |
| Uncontrolled HT        |            |             |                   |                      |
| Women                  | 98         | 462         | 1.34 (1.07–1.66)† | 1.39 (1.16–1.68)‡    |
| Men                    | 224        | 662         | 1.22 (1.07–1.38)† | 1.21 (1.09–1.34)‡    |
| <i>P</i>               | 322        | 1124        | 0.66              | 0.28                 |
| <50 years              |            |             |                   |                      |
| Women                  | 22         | 1953        | 2.20 (1.40–3.53)† | 2.12 (1.29–3.50)†    |
| Men                    | 28         | 1722        | 1.45 (0.93–2.27)  | 1.31 (0.84–2.04)     |
| <i>P</i>               | 50         | 3675        | 0.61              | 0.49                 |
| ≥50 years              |            |             |                   |                      |
| Women                  | 298        | 2444        | 1.52 (1.36–1.71)‡ | 1.51 (1.36–1.69)‡    |
| Men                    | 732        | 3238        | 1.31 (1.23–1.40)‡ | 1.24 (1.18–1.33)‡    |
| <i>P</i>               | 1030       | 5682        | 0.092             | 0.001                |
| No previous CV disease |            |             |                   |                      |
| Women                  | 272        | 4165        | 1.61 (1.43–1.82)‡ | 1.57 (1.40–1.76)‡    |
| Men                    | 585        | 4464        | 1.35 (1.26–1.45)‡ | 1.28 (1.20–1.36)‡    |
| <i>P</i>               | 857        | 8629        | 0.028             | 0.0046               |
| Previous CV disease    |            |             |                   |                      |
| Women                  | 48         | 232         | 1.31 (0.99–1.81)* | 1.33 (1.02–1.75)*    |
| Men                    | 175        | 496         | 1.20 (1.05–1.39)† | 1.15 (1.01–1.30)*    |
| <i>P</i>               | 223        | 728         | 0.47              | 0.17                 |
| European               |            |             |                   |                      |
| Women                  | 153        | 2624        | 1.68 (1.43–1.98)‡ | 1.65 (1.42–1.92)‡    |
| Men                    | 596        | 3700        | 1.28 (1.20–1.38)‡ | 1.22 (1.14–1.29)‡    |
| <i>P</i>               | 749        | 6324        | 0.030             | 0.005                |
| South American         |            |             |                   |                      |
| Women                  | 50         | 719         | 1.36 (1.03–1.80)* | 1.25 (0.94–1.65)     |
| Men                    | 65         | 653         | 1.46 (1.15–1.85)† | 1.37 (1.09–1.72)†    |
| <i>P</i>               | 115        | 1372        | 0.43              | 0.44                 |
| Asian                  |            |             |                   |                      |
| Women                  | 117        | 1054        | 1.43 (1.18–1.73)‡ | 1.46 (1.21–1.76)‡    |
| Men                    | 99         | 607         | 1.64 (1.33–2.02)‡ | 1.56 (1.29–1.89)‡    |

|          |     |      |      |      |
|----------|-----|------|------|------|
| <i>P</i> | 216 | 1661 | 0.48 | 0.78 |
|----------|-----|------|------|------|

---

Significance of the hazard ratios: \*  $P < 0.05$ , †  $P < 0.01$ , and ‡  $P < 0.001$ . For further explanation, see Table S3.

Figure S1

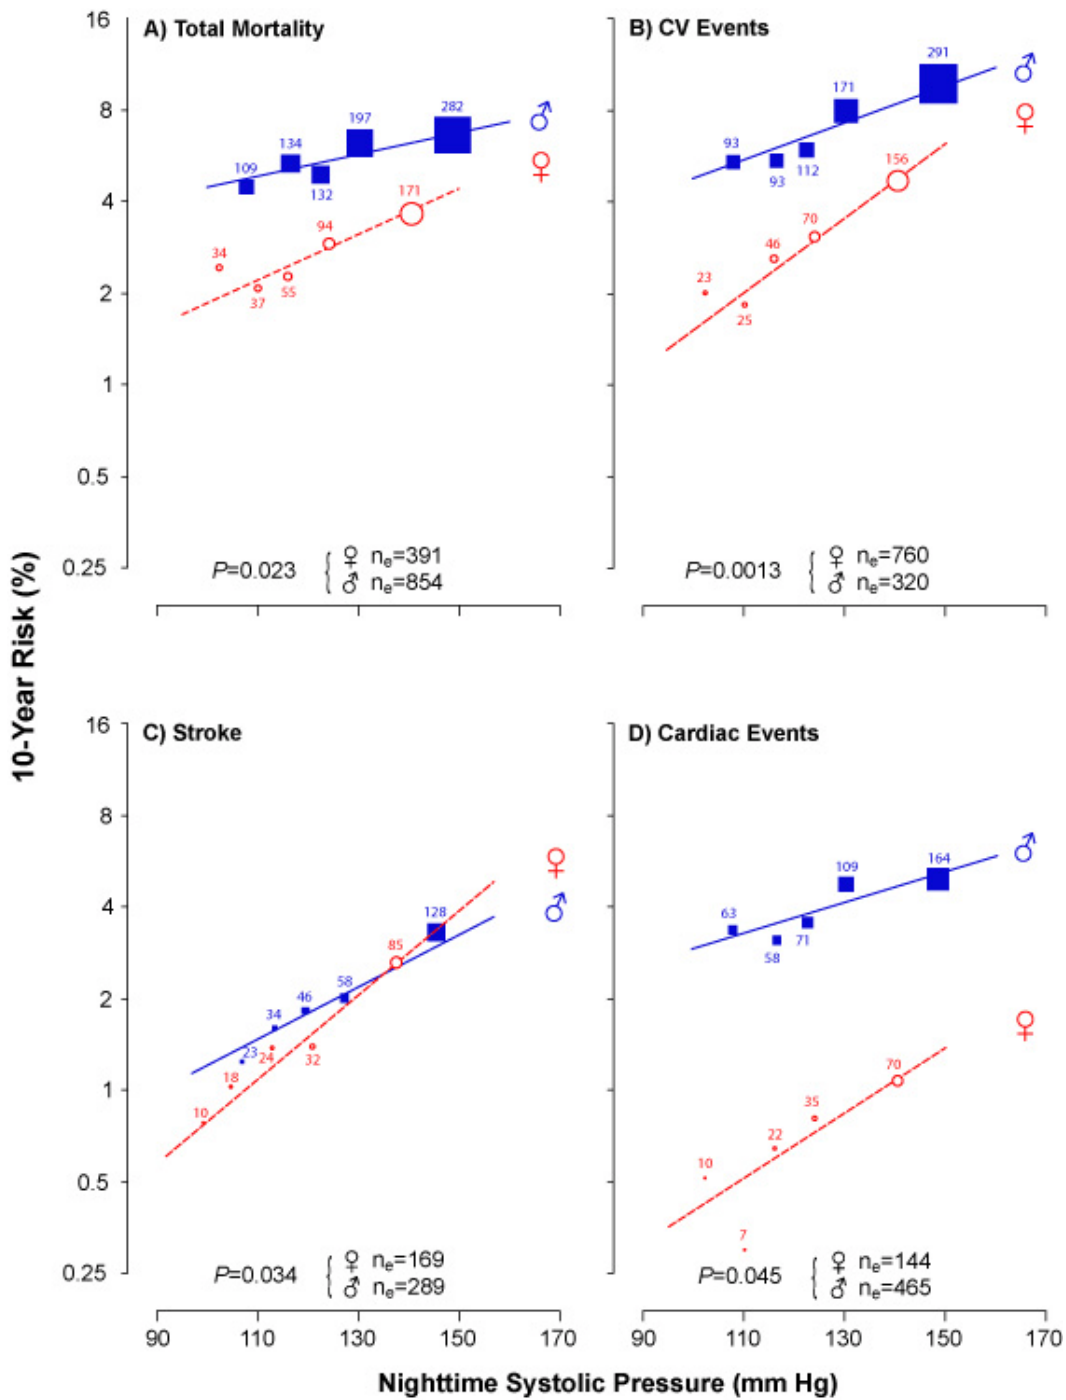



Figure S2

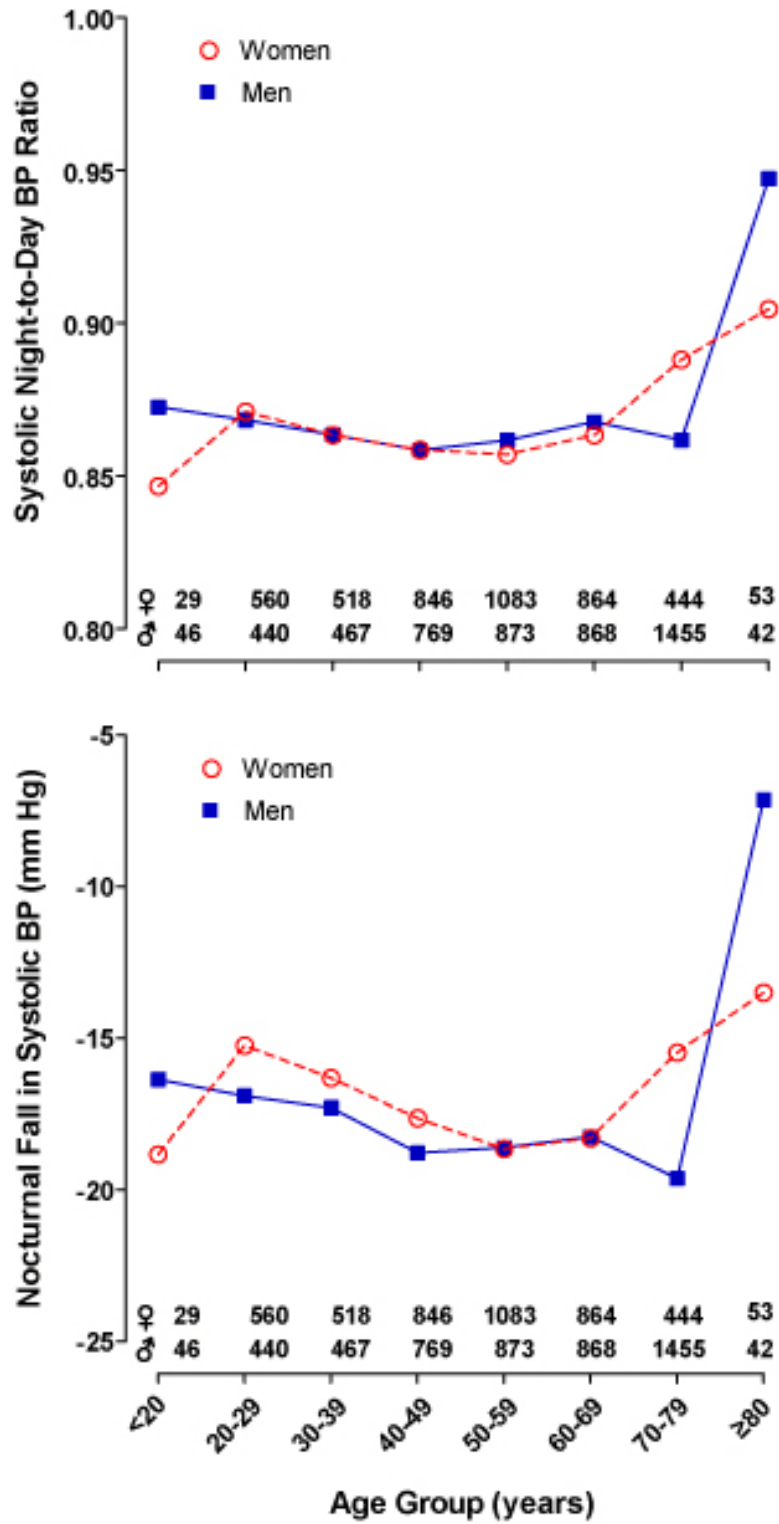

Supplement: NIHMS1726046-supplement-Supplementary_material.pdf [file NIHMS1726046-supplement-Supplementary_material.pdf]
